# Supplementary material for: The effect of sleep restriction on empathy for pain: An fMRI study in younger and older adults
Source: PubMed Central journal article supplement (PMC5612991; doi:10.1038/s41598-017-12098-9), 2017-09-25
Supplement: 41598_2017_12098_MOESM1_ESM.pdf [file 41598_2017_12098_MOESM1_ESM.pdf]

# The effect of sleep restriction on empathy for pain: An fMRI study in younger and older adults

*Sandra Tamm, Gustav Nilsson, Johanna Schwarz, Claus Lamm, Göran Kecklund, Predrag Petrovic, Håkan Fischer, Torbjörn Åkerstedt, Mats Lekander*

## Supplementary materials

### List of specific hypotheses

A complete list of preregistered hypotheses can be found at Open Science Framework (<https://osf.io/bxfsb/>), where the present experiment is referred to as “HANDS”. The hypotheses addressed in this manuscript are listed below. Other hypotheses in the preregistration will be addressed in coming manuscripts.

#### **Self-rated unpleasantness**

- 1: Partial sleep deprivation (PSD) will cause decreased ratings of unpleasantness.
- 2: Ratings of unpleasantness will be predicted by participants' ratings on the Interpersonal Reactivity Index Empathic Concern subscale (IRI-EC) and inversely predicted by the Psychopathic Personality Index-Revised Coldheartedness subscale (PPI-R-C).
- 3: Ratings of unpleasantness will habituate.

#### **Pupillometry**

- 1: Pictures with pain stimuli will cause greater pupil dilation than control pictures.
- 2: PSD will cause lesser pupil dilation in response to pain stimuli.

#### **Heart rate**

1: Pain stimuli will cause greater heart rate increases than no pain stimuli and PSD will interact with this increase to cause lesser increases to pain

### **BOLD response**

1: Pain stimuli will cause greater BOLD responses in the anterior insula (AI) and anterior/middle cingulate cortex (ACC/MCC) than control stimuli and PSD will interact with this increase to cause lesser increases to pain stimuli.

2: AI and ACC/MCC BOLD responses will be predicted by IRI-EC ratings and inversely predicted by PPI-R-C ratings (see above).

3: AI and ACC/MCC BOLD responses will be predicted by participants' rated unpleasantness.

### Supplementary figures

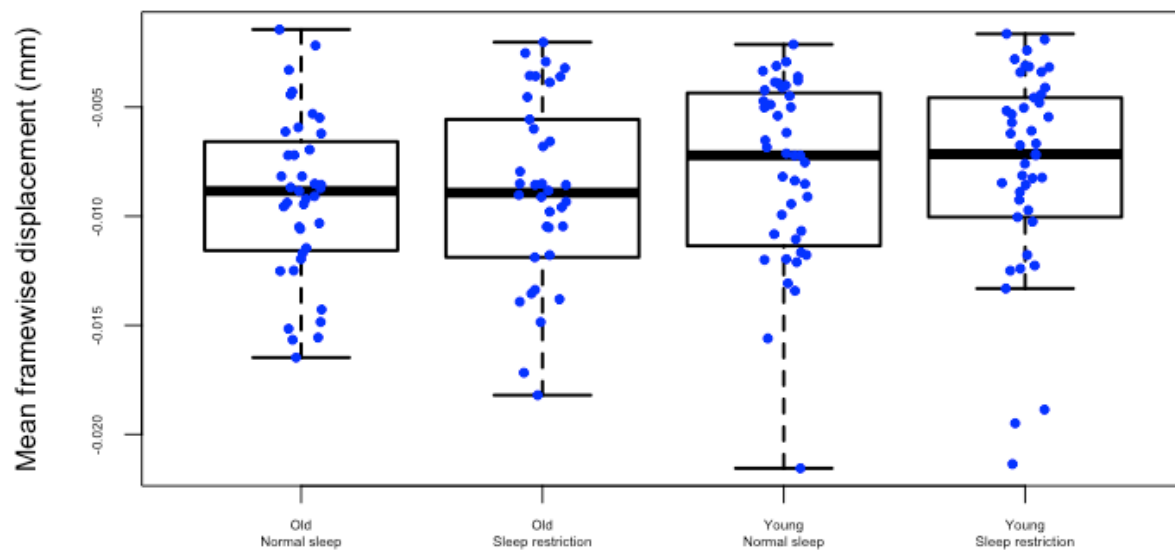

Supplementary figure 1a. Mean framewise displacement plotted per age group and sleep condition, dots show individual participants

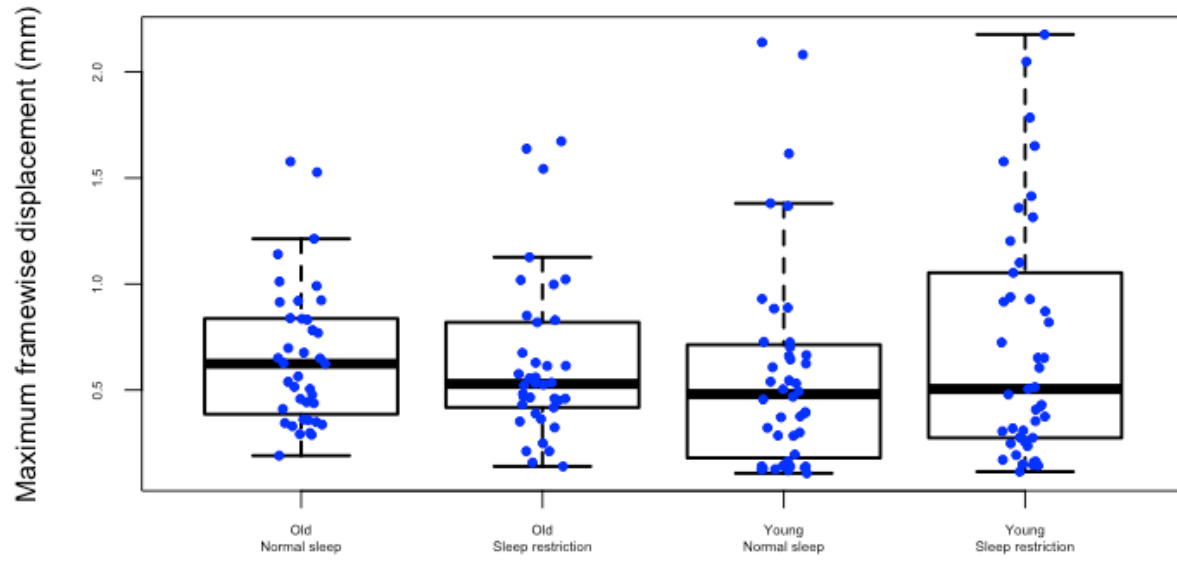

Supplementary figure 1b. Maximum framewise displacement plotted per age group and sleep condition, dots show individual participants.

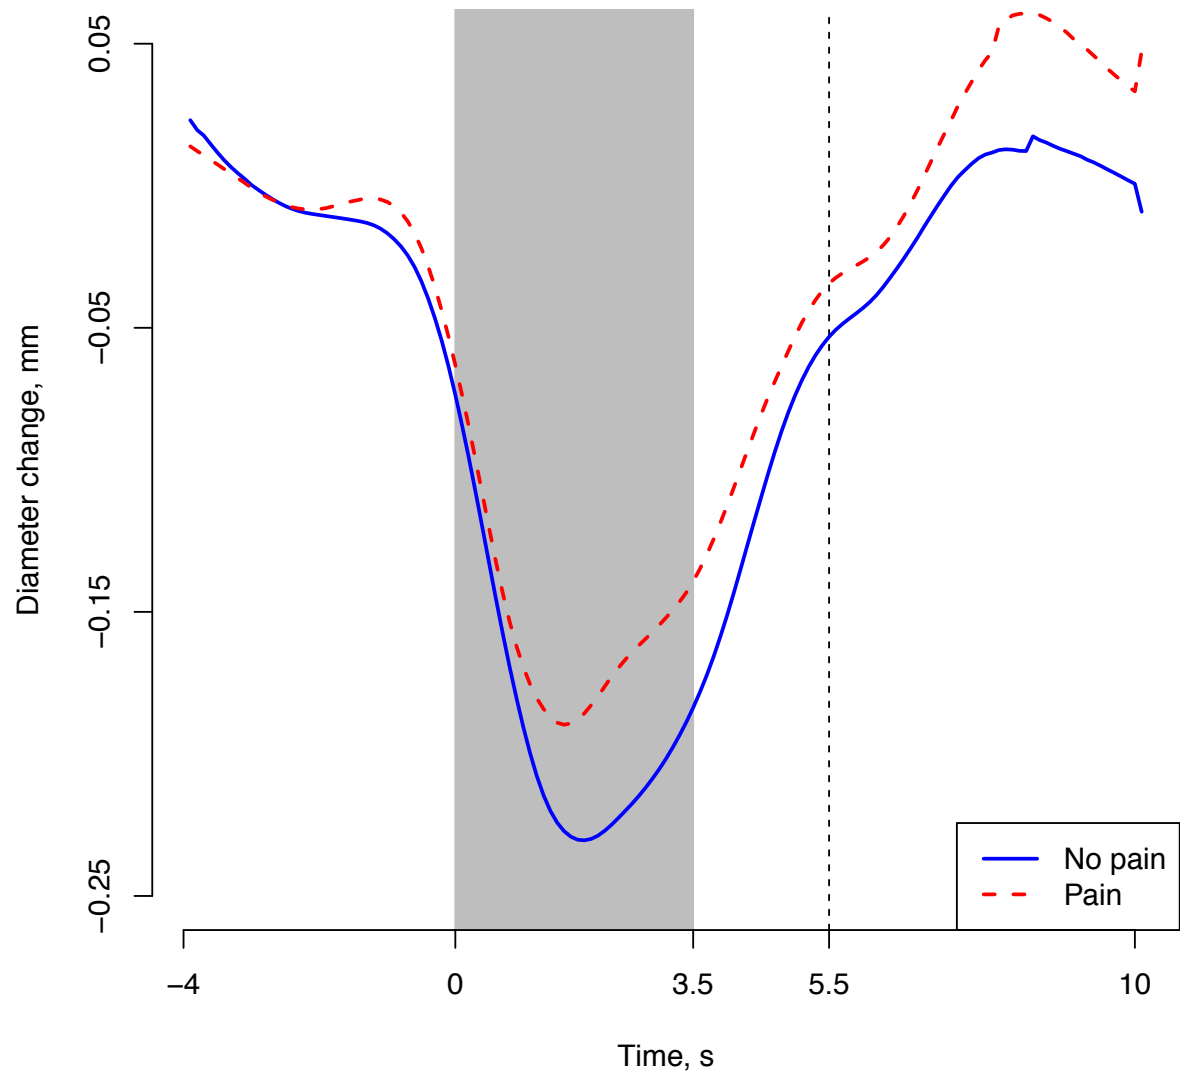

Supplementary figure 2a. Effect of stimulus type on pupil diameter

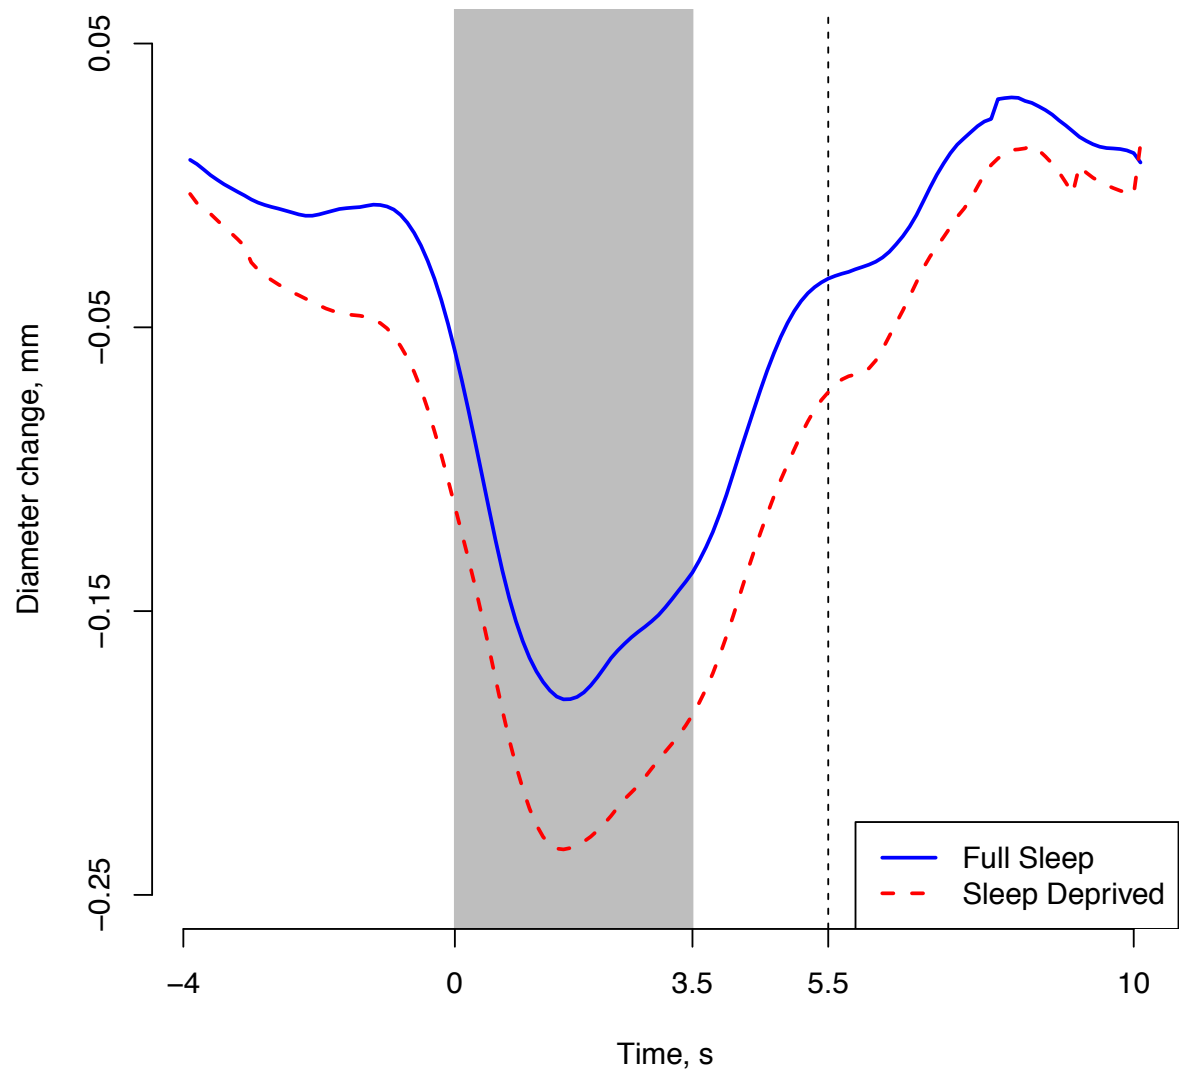

Supplementary figure 2b. Effect of sleep condition on pupil diameter

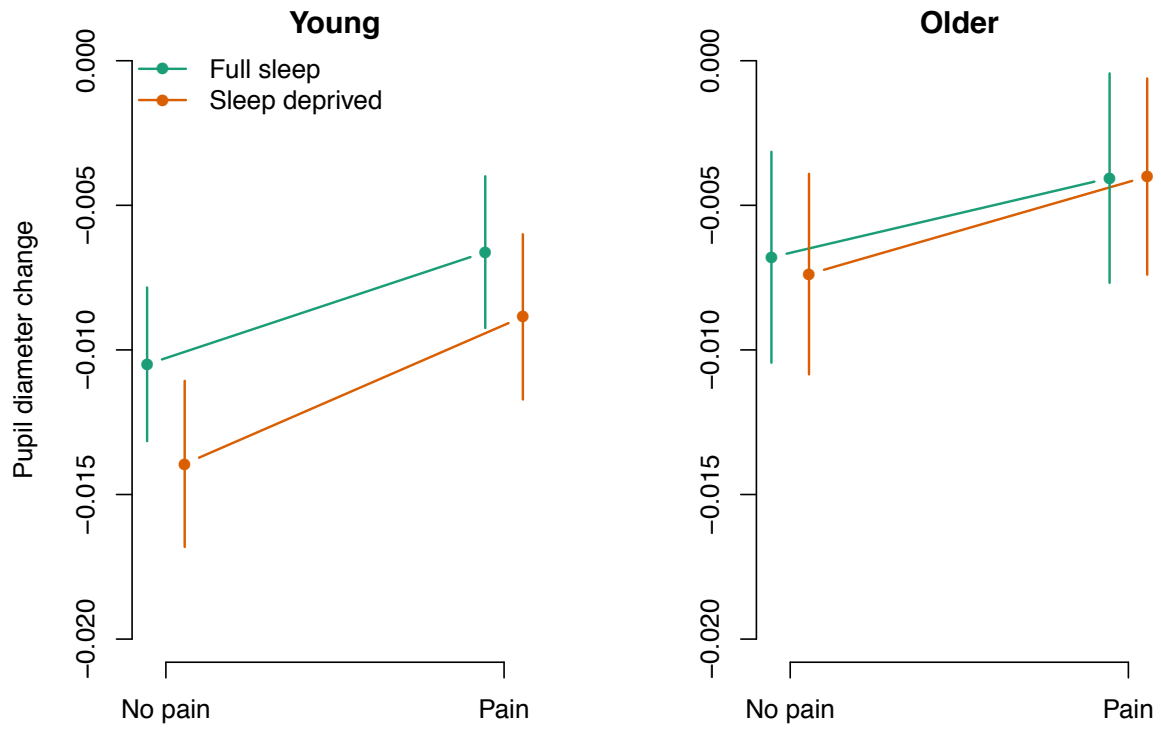

Supplementary figure 2c. Effect estimates and 95 % CI for pupil diameter change per condition and age group.

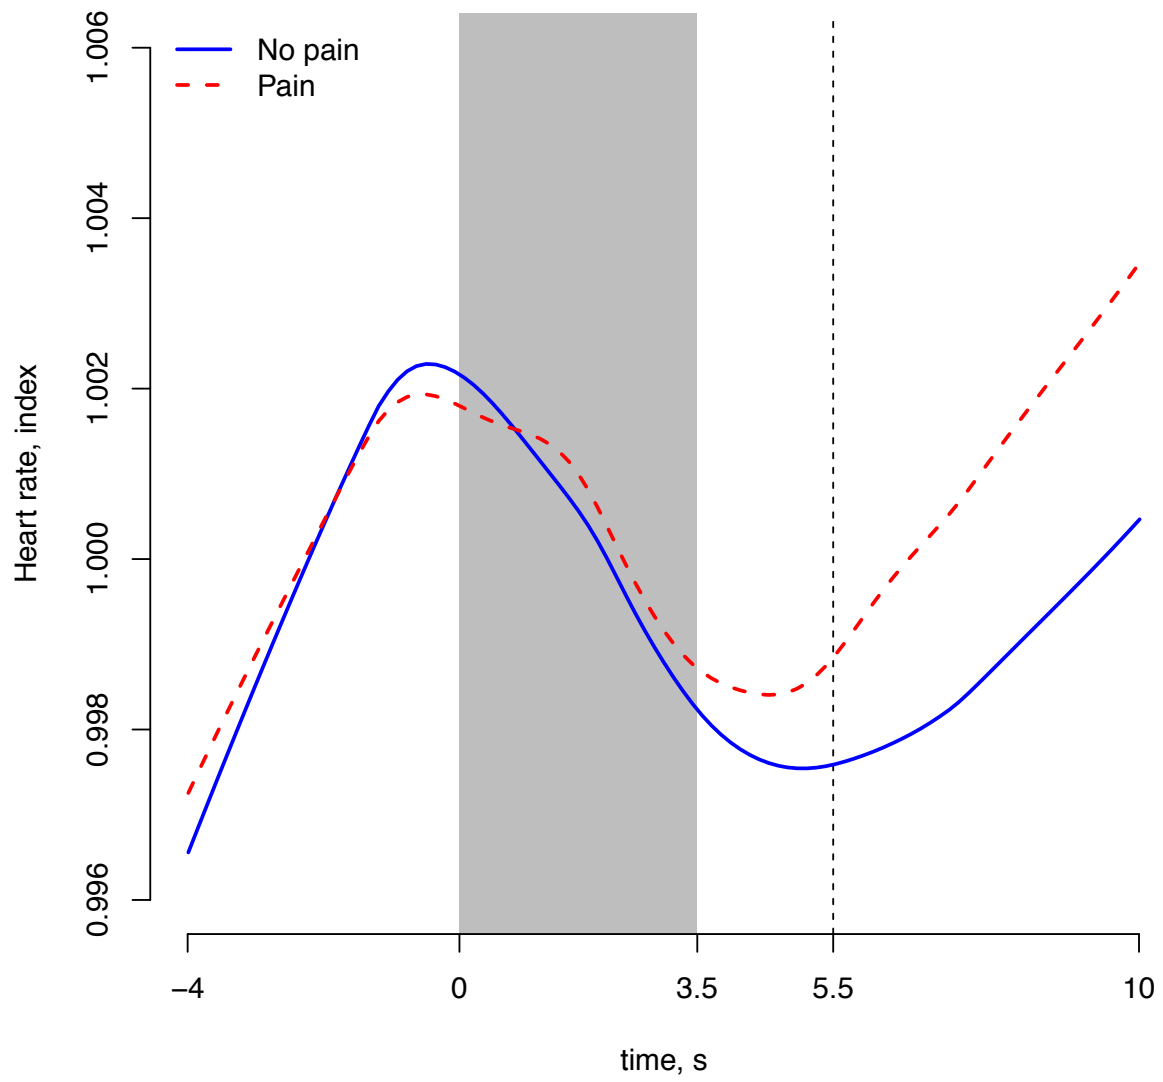

Supplementary figure 3a. Effects of stimulus on heart rate

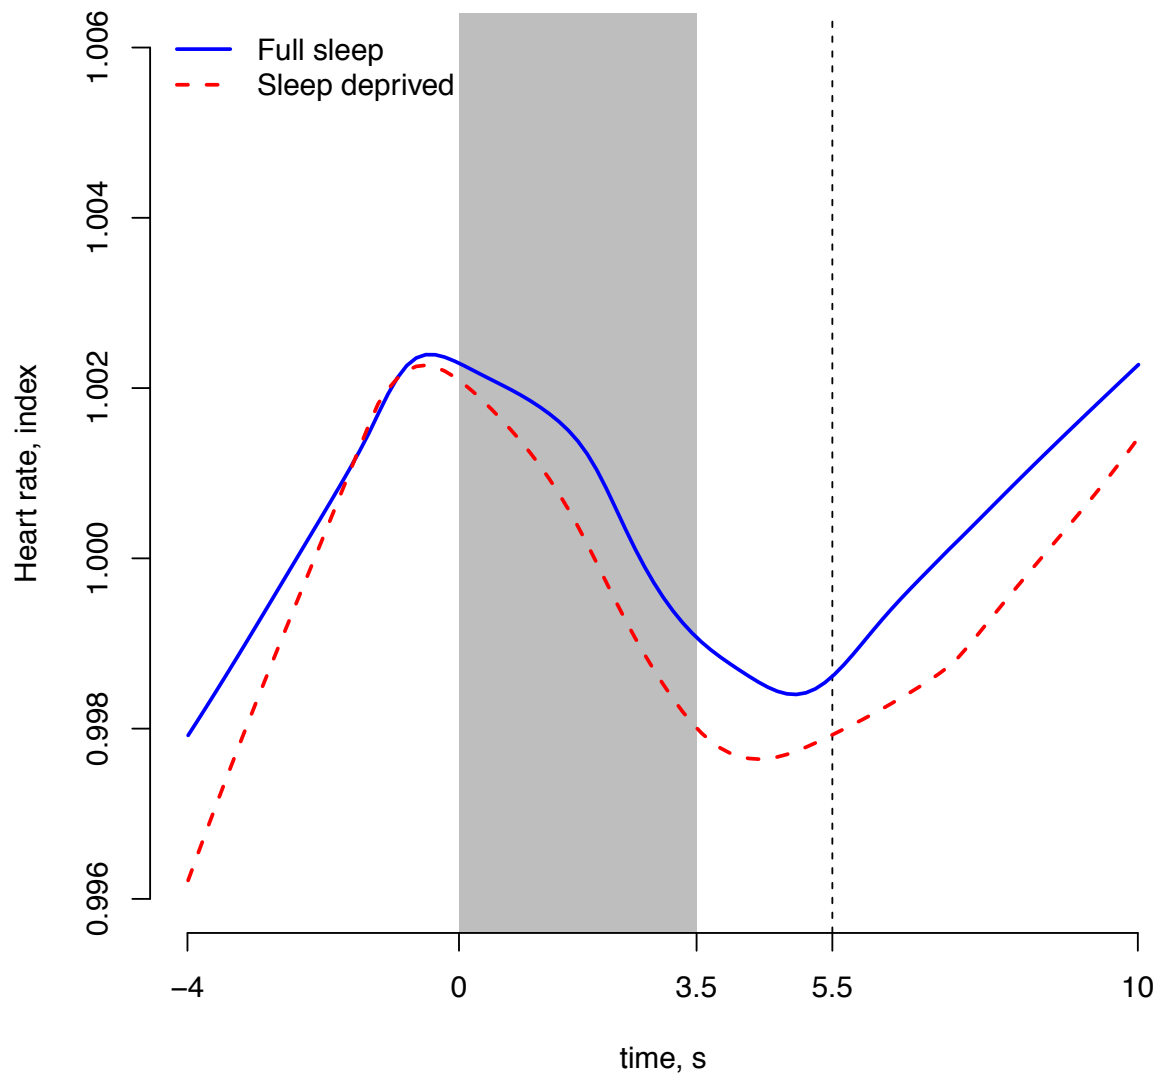

Supplementary figure 3b. Effects of sleep condition on heart rate



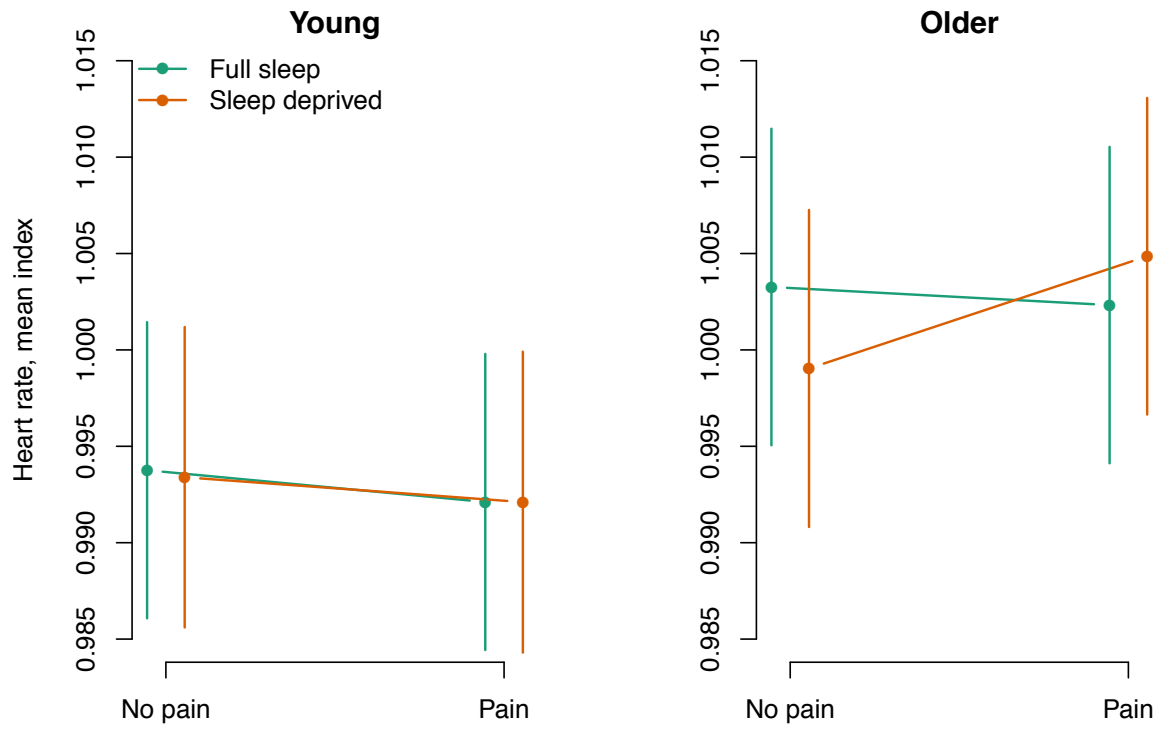

Figure 3c. Effect estimates and 95 % CI for heart rate per condition and age group.

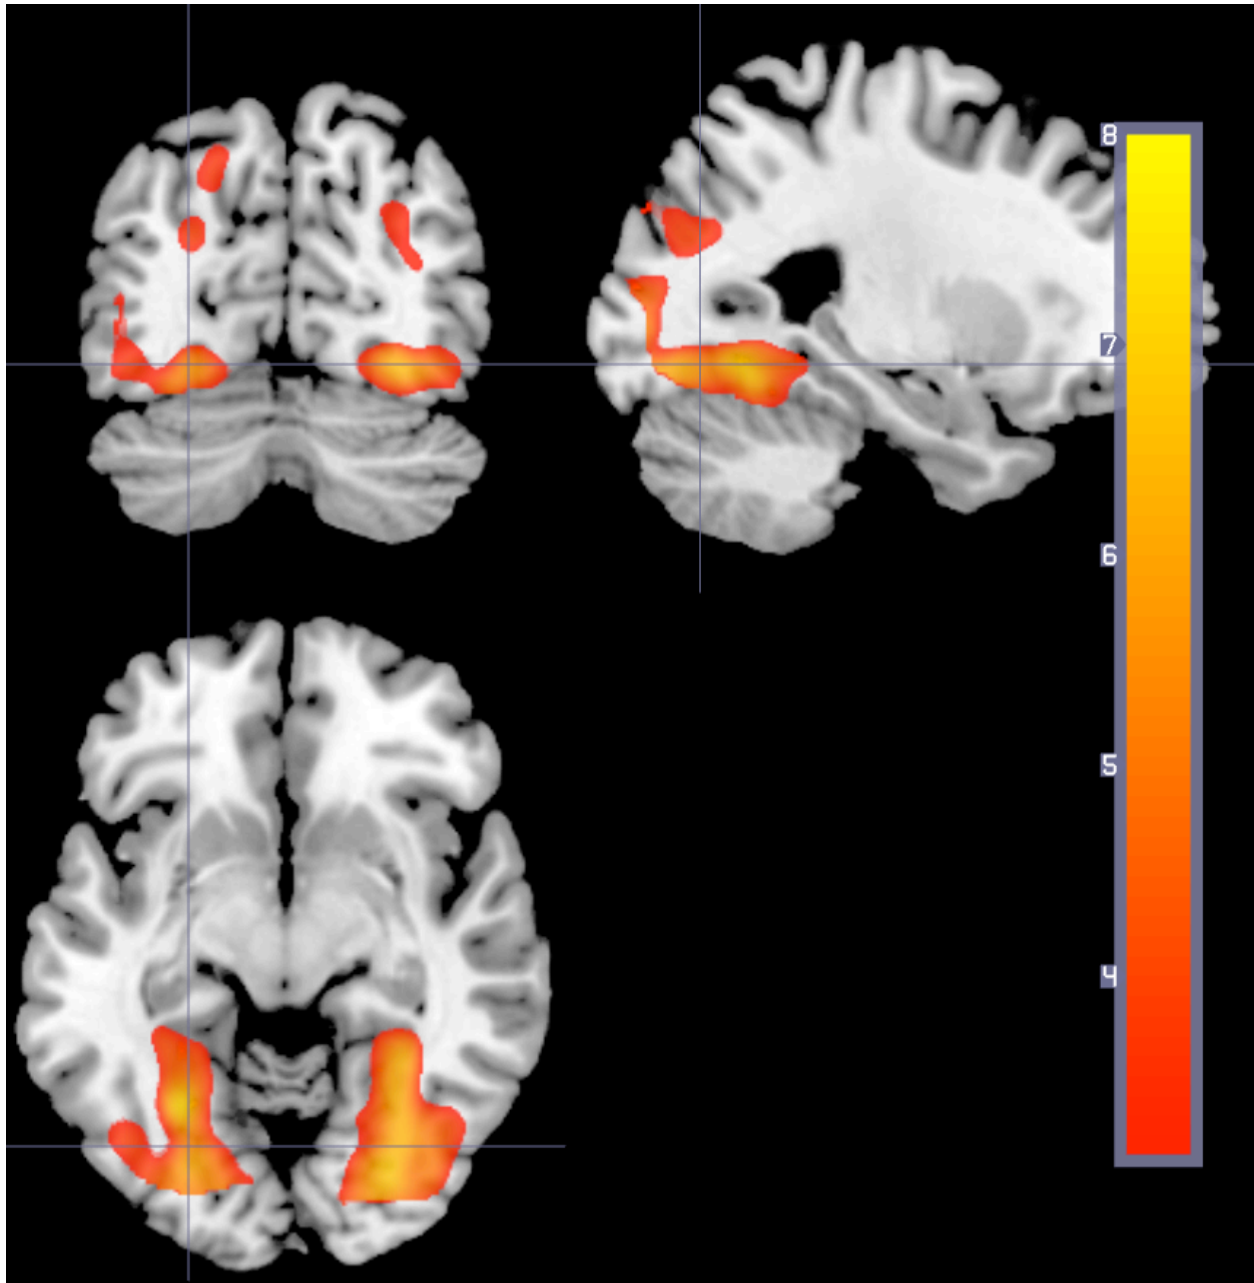

Supplementary figure 4. Older > young for the contrast no pain > baseline, 0.001 uncorrected for illustration. Color bar indicate T-values

| set | set | cluster     | cluster     | cluster | cluster | peak        | peak        | peak | peak   | peak   |     |     |        |  |
|-----|-----|-------------|-------------|---------|---------|-------------|-------------|------|--------|--------|-----|-----|--------|--|
| p   | c   | p(FWE-corr) | p(FDR-corr) | equivk  | p(unc)  | p(FWE-corr) | p(FDR-corr) | T    | equivZ | p(unc) | x   | y   | z (mm) |  |
| 0   | 17  | 0           | 0           | 3613    | 0       | 0           | 0           | 7.28 | 6.68   | 0      | -28 | -60 | -10    |  |
|     |     |             |             |         |         | 0           | 0           | 6.21 | 5.82   | 0      | -27 | -78 | -10    |  |
|     |     |             |             |         |         | 0.004       | 0.004       | 5.4  | 5.14   | 0      | -28 | -86 | 2      |  |
|     |     | 0           | 0           | 4770    | 0       | 0           | 0           | 6.81 | 6.31   | 0      | 27  | -78 | -9     |  |
|     |     |             |             |         |         | 0           | 0           | 6.47 | 6.04   | 0      | 32  | -50 | -6     |  |
|     |     |             |             |         |         | 0           | 0           | 6.45 | 6.02   | 0      | 32  | -68 | -10    |  |
|     |     | 0.001       | 0.001       | 1218    | 0       | 0.033       | 0.024       | 4.87 | 4.67   | 0      | -20 | -86 | 38     |  |
|     |     |             |             |         |         | 0.038       | 0.026       | 4.82 | 4.63   | 0      | -21 | -80 | 32     |  |
|     |     |             |             |         |         | 0.499       | 0.23        | 3.97 | 3.86   | 0      | -21 | -66 | 40     |  |
|     |     | 0.002       | 0.001       | 1145    | 0       | 0.084       | 0.054       | 4.6  | 4.43   | 0      | 33  | -50 | 62     |  |
|     |     |             |             |         |         | 0.121       | 0.073       | 4.49 | 4.33   | 0      | 33  | -45 | 51     |  |
|     |     |             |             |         |         | 0.717       | 0.348       | 3.77 | 3.67   | 0      | 26  | -62 | 60     |  |
|     |     | 0.045       | 0.018       | 536     | 0.007   | 0.162       | 0.088       | 4.4  | 4.25   | 0      | 51  | 10  | 28     |  |
|     |     | 0.012       | 0.006       | 770     | 0.002   | 0.202       | 0.1         | 4.32 | 4.18   | 0      | -42 | 4   | 27     |  |
|     |     |             |             |         |         | 0.401       | 0.201       | 4.07 | 3.95   | 0      | -51 | 9   | 20     |  |
|     |     |             |             |         |         | 0.744       | 0.348       | 3.74 | 3.65   | 0      | -54 | 6   | 40     |  |
|     |     | 0.017       | 0.008       | 707     | 0.003   | 0.211       | 0.1         | 4.31 | 4.17   | 0      | -54 | -27 | 30     |  |
|     |     |             |             |         |         | 0.526       | 0.239       | 3.95 | 3.84   | 0      | -62 | -18 | 30     |  |
|     |     | 0.172       | 0.063       | 324     | 0.03    | 0.742       | 0.348       | 3.75 | 3.65   | 0      | 32  | -3  | 51     |  |
|     |     |             |             |         |         | 0.885       | 0.434       | 3.58 | 3.49   | 0      | 48  | 6   | 52     |  |
|     |     |             |             |         |         | 0.886       | 0.434       | 3.58 | 3.49   | 0      | 42  | -3  | 57     |  |
|     |     | 0.901       | 0.515       | 50      | 0.363   | 0.751       | 0.348       | 3.74 | 3.64   | 0      | 40  | 36  | 15     |  |
|     |     | 0.901       | 0.515       | 50      | 0.363   | 0.868       | 0.434       | 3.6  | 3.52   | 0      | -18 | -66 | 63     |  |
|     |     | 0.837       | 0.485       | 69      | 0.285   | 0.888       | 0.434       | 3.57 | 3.49   | 0      | -36 | 36  | 10     |  |
|     |     |             |             |         |         | 0.939       | 0.52        | 3.48 | 3.4    | 0      | -36 | 28  | 18     |  |
|     |     | 0.957       | 0.647       | 29      | 0.495   | 0.919       | 0.479       | 3.52 | 3.44   | 0      | 64  | -18 | 38     |  |
|     |     | 0.827       | 0.485       | 72      | 0.275   | 0.96        | 0.587       | 3.43 | 3.35   | 0      | -36 | -40 | 42     |  |
|     |     | 0.993       | 0.928       | 6       | 0.782   | 0.977       | 0.643       | 3.37 | 3.29   | 0      | -34 | -87 | 26     |  |
|     |     | 0.995       | 0.928       | 4       | 0.829   | 0.979       | 0.644       | 3.36 | 3.29   | 0.001  | -33 | -57 | 63     |  |
|     |     | 0.997       | 0.928       | 2       | 0.888   | 0.996       | 0.903       | 3.2  | 3.14   | 0.001  | 24  | -57 | 21     |  |
|     |     | 0.997       | 0.928       | 1       | 0.928   | 0.998       | 1           | 3.15 | 3.09   | 0.001  | -10 | -68 | 63     |  |

Supplementary table 1. Older > young for the contrast no pain > baseline

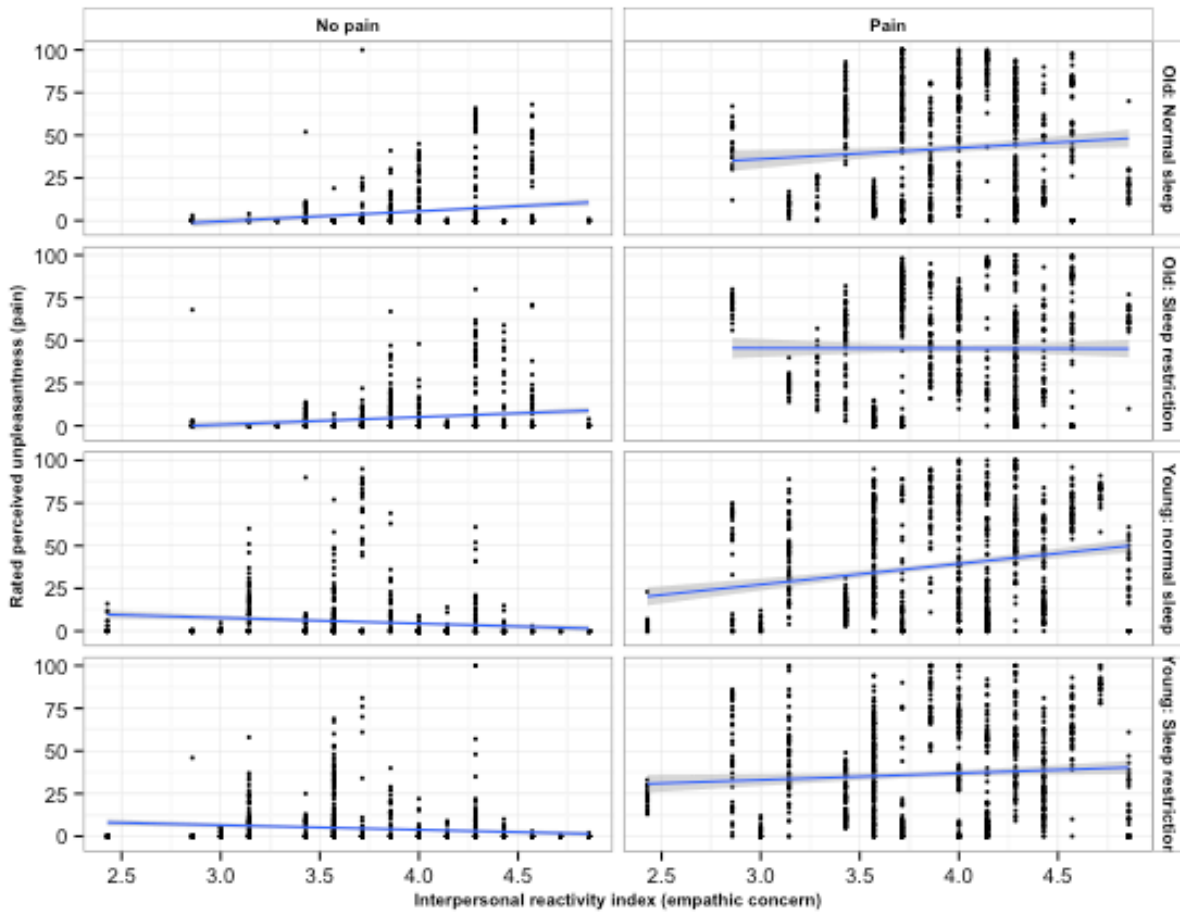

Supplementary figure 5. Relation between IRI-EC and rated unpleasantness, per stimulus type, age group, and sleep condition

## Detailed fMRI tables

In the main manuscript, we provide peak level corrected statistics for the fMRI results. For completeness, we here provide corresponding tables (matching table 2-5 in main manuscript) including also cluster statistics.

| Anatomical area (peak coordinate)        |                         | cluster     | cluster | cluster | peak        | peak  | peak   | peak   |
|------------------------------------------|-------------------------|-------------|---------|---------|-------------|-------|--------|--------|
| MRICron (automated anatomical labeling ) | MNI coords mm (x, y, z) | p(FWE-corr) | equivk  | p(unc)  | p(FWE-corr) | T     | equivZ | p(unc) |
| Supramarginal (L)                        | -58, -27, 34            | <0.001      | 12036   | <0.001  | <0.001      | 11.93 | Inf    | <0.001 |
| Superior parietal (L)                    | -16, -68, 54            |             |         |         | <0.001      | 9.44  | 7.78   | <0.001 |
| Inferior parietal (L)                    | -33, -46, 50            |             |         |         | <0.001      | 9.02  | 7.53   | <0.001 |
| Inferior occipital (R)                   | 33, -86, -4             | <0.001      | 6294    | <0.001  | <0.001      | 10.15 | Inf    | <0.001 |
| Middle occipital (R)                     | 38, -82, 10             |             |         |         | <0.001      | 8.78  | 7.39   | <0.001 |
| Middle occipital (R)                     | 38, -74, 28             |             |         |         | <0.001      | 8.32  | 7.1    | <0.001 |
| Precentral (L)                           | -51, 6, 30              | <0.001      | 1599    | <0.001  | <0.001      | 9.31  | 7.71   | <0.001 |
| Rolandic operculum (L)                   | -52, 6, 9               |             |         |         | 0.006       | 5.43  | 5.02   | <0.001 |
| Superior medial frontal (L)              | -4, 21, 44              | <0.001      | 3203    | <0.001  | <0.001      | 8.75  | 7.37   | <0.001 |
| Middle cingulate cortex (L)              | -4, 27, 38              |             |         |         | <0.001      | 8.39  | 7.14   | <0.001 |
| Anterior cingulate cortex (L)            | -2, 18, 27              |             |         |         | 0.029       | 5     | 4.67   | <0.001 |
| Middle frontal (L)                       | -26, 0, 52              | <0.001      | 1141    | <0.001  | <0.001      | 8     | 6.89   | <0.001 |
| Insula (R)                               | 32, 24, 4               | <0.001      | 2101    | <0.001  | <0.001      | 7.69  | 6.68   | <0.001 |
| Inferior frontal operculum (R)           | 51, 9, 27               |             |         |         | <0.001      | 7.41  | 6.49   | <0.001 |
| Inferior frontal operculum (R)           | 50, 15, 4               |             |         |         | 0.003       | 5.65  | 5.19   | <0.001 |
| Insula (L)                               | -34, 20, 6              | <0.001      | 1054    | <0.001  | <0.001      | 7.52  | 6.56   | <0.001 |
| Inferior frontal, triangular part (L)    | -44, 39, 6              | <0.001      | 1034    | <0.001  | <0.001      | 6.6   | 5.92   | <0.001 |
| Inferior frontal, triangular part (L)    | -42, 33, 27             |             |         |         | <0.001      | 6.16  | 5.59   | <0.001 |
| Middle frontal (L)                       | -30, 48, 14             |             |         |         | 0.001       | 5.84  | 5.34   | <0.001 |
| Precentral (R)                           | 30, -2, 52              | <0.001      | 526     | <0.001  | <0.001      | 6.36  | 5.73   | <0.001 |
| Insula (L)                               | -36, -2, 15             | 0.007       | 43      | 0.144   | 0.002       | 5.79  | 5.3    | <0.001 |
| NA                                       | -8, -24, -12            | 0.001       | 114     | 0.024   | 0.003       | 5.61  | 5.16   | <0.001 |
| Thalamus (L)                             | -12, -15, 9             | 0.007       | 45      | 0.136   | 0.006       | 5.43  | 5.02   | <0.001 |

Supplementary table 2. Pain > no pain for all subjects across sleep conditions, thresholded at 0.05 FWE corrected and only clusters with > 20 voxels are reported. Anatomic labels are shown for peak coordinates and were defined using the automatic anatomic labelling in MRICron.

| Anatomical area (peak coordinate)       | MNI coords mm (x, y, z) | cluster | cluster | cluster | cluster | peak        | peak        | peak  | peak   | peak   |
|-----------------------------------------|-------------------------|---------|---------|---------|---------|-------------|-------------|-------|--------|--------|
| MRIcron (automated anatomical labeling) | MNI coords mm (x, y, z) | p(FWE)  | p(FDR)  | equivk  | p(unc)  | p(FWE-corr) | p(FDR-corr) | T     | equivZ | p(unc) |
| Inferior parietal (L)                   | -30, -46, 45            | <0.001  | <0.001  | 51828   | <0.001  | <0.001      | <0.001      | 13.92 | Inf    | <0.001 |
| Middle occipital (R)                    | 33, -80, 32             |         |         |         |         | <0.001      | <0.001      | 13.59 | Inf    | <0.001 |
| Superior parietal (L)                   | -20, -66, 51            |         |         |         |         | <0.001      | <0.001      | 13.05 | Inf    | <0.001 |
| Inferior frontal operculum (R)          | 45, 9, 28               | <0.001  | <0.001  | 9990    | <0.001  | <0.001      | <0.001      | 12.16 | Inf    | <0.001 |
| Insula (R)                              | 34, 24, 4               |         |         |         |         | <0.001      | <0.001      | 10.57 | Inf    | <0.001 |
| Precentral (R)                          | 38, 2, 52               |         |         |         |         | <0.001      | <0.001      | 10.19 | Inf    | <0.001 |
| Supplemental motor area (L)             | -6, 9, 50               | <0.001  | <0.001  | 4590    | <0.001  | <0.001      | <0.001      | 12.09 | Inf    | <0.001 |
| Supplemental motor area (R)             | 8, 14, 51               |         |         |         |         | <0.001      | <0.001      | 11.29 | Inf    | <0.001 |
| Anterior cingulate cortex (R)           | 8, 15, 28               |         |         |         |         | 0.001       | 0.034       | 5.85  | 5.35   | <0.001 |
| NA                                      | -8, -20, -8             | <0.001  | <0.001  | 3950    | <0.001  | <0.001      | <0.001      | 10.09 | Inf    | <0.001 |
| Thalamus (L)                            | -14, -21, 6             |         |         |         |         | <0.001      | <0.001      | 8.8   | 7.4    | <0.001 |
| Thalamus (L)                            | -16, -28, 2             |         |         |         |         | <0.001      | <0.001      | 8.5   | 7.21   | <0.001 |
| Middle frontal (L)                      | -42, 34, 32             | <0.001  | <0.001  | 3801    | <0.001  | <0.001      | <0.001      | 7.95  | 6.85   | <0.001 |
| Middle frontal (L)                      | -32, 51, 14             |         |         |         |         | <0.001      | <0.001      | 7.47  | 6.53   | <0.001 |
| Middle frontal (L)                      | -40, 40, 22             |         |         |         |         | <0.001      | <0.001      | 7.38  | 6.47   | <0.001 |
| NA                                      | 14, 0, 2                | 0       | 0.38    | 25      | 0.226   | 0.004       | 0.079       | 5.62  | 5.17   | <0.001 |
| NA                                      | -34, -3, -12            | 0       | 0.4     | 20      | 0.277   | 0.011       | 0.228       | 5.31  | 4.92   | <0.001 |

Supplementary table 3. Pain > baseline for all subjects across sleep conditions, thresholded at 0.05 FWE corrected and only clusters with > 20 voxels are reported. Anatomic labels are shown for peak coordinates and were defined using the automatic anatomic labelling in MRIcron.

| A                                       |                         |             |             |         |         |             |             |      |        |        |
|-----------------------------------------|-------------------------|-------------|-------------|---------|---------|-------------|-------------|------|--------|--------|
| Anatomical area (peak coordinate)       | MNI coords mm (x, y, z) | cluster     | cluster     | cluster | cluster | peak        | peak        | peak | peak   | peak   |
| MRICron (automated anatomical labeling) |                         | p(FWE-corr) | p(FDR-corr) | equivk  | p(unc)  | p(FWE-corr) | p(FDR-corr) | T    | equivZ | p(unc) |
| Angular (L)                             | -48, -74, 30            | <0.001      | <0.001      | 2857    | <0.001  | <0.001      | 0.001       | 6.4  | 5.98   | <0.001 |
| Middle occipital (L)                    | -40, -78, 36            |             |             |         |         | 0.001       | 0.003       | 5.8  | 5.48   | <0.001 |
| Angular (L)                             | -40, -62, 32            |             |             |         |         | 0.143       | 0.14        | 4.33 | 4.19   | <0.001 |
| Calcarine (L)                           | -2, -87, 14             | <0.001      | <0.001      | 9176    | <0.001  | 0.005       | 0.017       | 5.27 | 5.02   | <0.001 |
| Cuneus (L)                              | -10, -93, 14            |             |             |         |         | 0.007       | 0.019       | 5.18 | 4.94   | <0.001 |
| Calcarine (L)                           | -2, -63, 16             |             |             |         |         | 0.017       | 0.039       | 4.95 | 4.74   | <0.001 |
| Angular (R)                             | 48, -69, 32             | 0.073       | 0.083       | 589     | 0.017   | 0.025       | 0.049       | 4.84 | 4.65   | <0.001 |
| Superior frontal (R)                    | 30, 27, 52              | 0.023       | 0.032       | 860     | 0.005   | 0.028       | 0.049       | 4.81 | 4.62   | <0.001 |
| Middle frontal (R)                      | 26, 42, 42              |             |             |         |         | 0.327       | 0.257       | 4.04 | 3.92   | <0.001 |
| Middle temporal (L)                     | -56, -48, -6            | 0.012       | 0.022       | 1025    | 0.003   | 0.078       | 0.092       | 4.52 | 4.36   | <0.001 |
| Middle temporal (L)                     | -51, -42, 0             |             |             |         |         | 0.672       | 0.488       | 3.7  | 3.6    | <0.001 |
| Middle temporal (L)                     | -56, -36, 10            |             |             |         |         | 0.891       | 0.629       | 3.44 | 3.37   | <0.001 |
| Middle frontal (L)                      | -27, 38, 45             | 0.363       | 0.309       | 250     | 0.099   | 0.256       | 0.202       | 4.13 | 4.01   | <0.001 |
| Superior frontal (L)                    | -21, 44, 44             |             |             |         |         | 0.745       | 0.488       | 3.62 | 3.53   | <0.001 |
| Superior frontal (L)                    | -22, 36, 36             |             |             |         |         | 0.958       | 0.847       | 3.3  | 3.23   | 0.001  |
| Superior temporal (R)                   | 64, -9, 8               | 0.269       | 0.287       | 311     | 0.069   | 0.457       | 0.362       | 3.9  | 3.79   | <0.001 |
| Rolandic operculum (R)                  | 51, -8, 20              |             |             |         |         | 0.957       | 0.847       | 3.3  | 3.23   | 0.001  |
| Postcentral (R)                         | 64, -6, 27              | 0.356       | 0.309       | 254     | 0.097   | 0.644       | 0.488       | 3.72 | 3.63   | <0.001 |
| Precentral (R)                          | 20, -22, 66             | 0.862       | 0.777       | 54      | 0.435   | 0.653       | 0.488       | 3.71 | 3.62   | <0.001 |
| Precentral (R)                          | 30, -22, 64             |             |             |         |         | 0.939       | 0.776       | 3.35 | 3.28   | 0.001  |
| Medial frontal orbital (R)              | 2, 54, -8               | 0.694       | 0.542       | 111     | 0.26    | 0.676       | 0.488       | 3.69 | 3.6    | <0.001 |
| Cerebellum (R)                          | 12, -54, -8             | 0.628       | 0.494       | 134     | 0.217   | 0.707       | 0.488       | 3.66 | 3.57   | <0.001 |
| Precentral (R)                          | 45, -10, 52             | 0.478       | 0.357       | 193     | 0.143   | 0.715       | 0.488       | 3.65 | 3.56   | <0.001 |
| Parahippocampal (L)                     | -20, -38, -8            | 0.476       | 0.357       | 194     | 0.142   | 0.717       | 0.488       | 3.65 | 3.56   | <0.001 |
| Parahippocampal (L)                     | -27, -36, -10           |             |             |         |         | 0.791       | 0.508       | 3.57 | 3.49   | <0.001 |
| Superior temporal (L)                   | -54, -15, 2             | 0.935       | 0.918       | 26      | 0.6     | 0.732       | 0.488       | 3.64 | 3.55   | <0.001 |
| Superior temporal (R)                   | 46, -32, 15             | 0.795       | 0.67        | 77      | 0.348   | 0.784       | 0.508       | 3.58 | 3.5    | <0.001 |
| Superior temporal (R)                   | 57, -2, -8              | 0.942       | 0.918       | 23      | 0.624   | 0.869       | 0.602       | 3.48 | 3.4    | <0.001 |
| Precentral (R)                          | 39, -15, 38             | 0.93        | 0.918       | 28      | 0.584   | 0.966       | 0.869       | 3.28 | 3.21   | 0.001  |
| Precentral (R)                          | 36, -15, 48             |             |             |         |         | 0.989       | 0.989       | 3.16 | 3.1    | 0.001  |
| B                                       |                         |             |             |         |         |             |             |      |        |        |
| Anatomical area (peak coordinate)       | MNI coords mm (x, y, z) | cluster     | cluster     | cluster | cluster | peak        | peak        | peak | peak   | peak   |
| MRICron (automated anatomical labeling) |                         | p(FWE-corr) | p(FDR-corr) | equivk  | p(unc)  | p(FWE-corr) | p(FDR-corr) | T    | equivZ | p(unc) |
| Anterior cingulate cortex (R)           | 9, 24, 26               | 0.634       | 0.491       | 122     | 0.152   | 0.334       | 0.308       | 4.15 | 4.03   | <0.001 |
| Postcentral (L)                         | -39, 22, 50             | 0.727       | 0.491       | 98      | 0.196   | 0.604       | 0.351       | 3.89 | 3.78   | <0.001 |
| Postcentral (L)                         | -51, -26, 57            | 0.968       | 0.853       | 25      | 0.52    | 0.984       | 0.929       | 3.34 | 3.27   | 0.001  |
| C                                       |                         |             |             |         |         |             |             |      |        |        |
| Anatomical area (peak coordinate)       | MNI coords mm (x, y, z) | cluster     | cluster     | cluster | cluster | peak        | peak        | peak | peak   | peak   |
| MRICron (automated anatomical labeling) |                         | p(FWE-corr) | p(FDR-corr) | equivk  | p(unc)  | p(FWE-corr) | p(FDR-corr) | T    | equivZ | p(unc) |
| Fusiform (L)                            | -24, -75, -10           | <0.001      | <0.001      | 15740   | <0.001  | <0.001      | <0.001      | 7.93 | 7.19   | <0.001 |
| Fusiform (L)                            | -28, -60, -10           |             |             |         |         | <0.001      | <0.001      | 7.56 | 6.9    | <0.001 |
| Fusiform (R)                            | 28, -66, -9             |             |             |         |         | <0.001      | <0.001      | 7.28 | 6.69   | <0.001 |
| Precentral (R)                          | 58, 2, 40               | 0.178       | 0.123       | 311     | 0.03    | 0.081       | 0.064       | 4.62 | 4.45   | <0.001 |
| Precentral (R)                          | 63, 9, 26               |             |             |         |         | 0.933       | 0.623       | 3.51 | 3.43   | <0.001 |
| Superior occipital (R)                  | 24, -81, 40             | 0.139       | 0.107       | 348     | 0.023   | 0.083       | 0.064       | 4.61 | 4.44   | <0.001 |
| Superior occipital (R)                  | 32, -76, 45             |             |             |         |         | 0.871       | 0.537       | 3.61 | 3.53   | <0.001 |
| Superior parietal (R)                   | 34, -45, 62             | <0.001      | 0.001       | 1463    | <0.001  | 0.116       | 0.076       | 4.51 | 4.35   | <0.001 |
| Inferior parietal (R)                   | 28, -48, 54             |             |             |         |         | 0.183       | 0.102       | 4.37 | 4.22   | <0.001 |
| Postcentral (R)                         | 32, -33, 51             |             |             |         |         | 0.802       | 0.485       | 3.7  | 3.6    | <0.001 |
| Middle frontal (R)                      | 44, -3, 54              | 0.008       | 0.011       | 817     | 0.001   | 0.12        | 0.076       | 4.5  | 4.34   | <0.001 |
| Precentral (R)                          | 34, -2, 50              |             |             |         |         | 0.334       | 0.154       | 4.15 | 4.03   | <0.001 |
| Superior frontal (R)                    | 32, -4, 62              |             |             |         |         | 0.693       | 0.375       | 3.81 | 3.71   | <0.001 |
| Postcentral (L)                         | -62, -15, 30            | 0.009       | 0.011       | 799     | 0.001   | 0.282       | 0.145       | 4.22 | 4.08   | <0.001 |
| Supramarginal (L)                       | -58, -26, 26            |             |             |         |         | 0.298       | 0.145       | 4.2  | 4.07   | <0.001 |
| Postcentral (L)                         | -51, -22, 33            |             |             |         |         | 0.903       | 0.587       | 3.57 | 3.48   | <0.001 |
| Calcarine (R)                           | 21, -54, 10             | 0.128       | 0.107       | 360     | 0.021   | 0.304       | 0.145       | 4.19 | 4.06   | <0.001 |
| Lingual (R)                             | 6, -60, 9               |             |             |         |         | 0.955       | 0.649       | 3.46 | 3.38   | <0.001 |
| NA                                      | 9, -27, -4              | 0.062       | 0.064       | 472     | 0.01    | 0.479       | 0.228       | 4    | 3.89   | <0.001 |
| NA                                      | -3, -45, 8              |             |             |         |         | 0.857       | 0.537       | 3.63 | 3.54   | <0.001 |
| NA                                      | -6, -28, -8             |             |             |         |         | 0.906       | 0.587       | 3.56 | 3.48   | <0.001 |
| Superior parietal (L)                   | -33, -57, 63            | 0.935       | 0.857       | 39      | 0.415   | 0.707       | 0.38        | 3.79 | 3.69   | <0.001 |
| Inferior parietal (L)                   | -34, -40, 48            | 0.86        | 0.755       | 63      | 0.297   | 0.806       | 0.485       | 3.69 | 3.6    | <0.001 |
| NA                                      | 24, -26, -4             | 0.953       | 0.857       | 32      | 0.462   | 0.852       | 0.537       | 3.64 | 3.55   | <0.001 |
| Inferior frontal operculum (L)          | -44, 6, 30              | 0.275       | 0.178       | 248     | 0.049   | 0.866       | 0.537       | 3.62 | 3.53   | <0.001 |
| Precentral (L)                          | -50, 3, 34              |             |             |         |         | 0.868       | 0.537       | 3.62 | 3.53   | <0.001 |
| Postcentral (R)                         | 66, -12, 22             | 0.955       | 0.857       | 31      | 0.47    | 0.884       | 0.554       | 3.59 | 3.51   | <0.001 |
| Inferior frontal operculum (L)          | -52, 9, 20              | 0.684       | 0.575       | 109     | 0.174   | 0.914       | 0.598       | 3.55 | 3.46   | <0.001 |
| Precentral (L)                          | -44, -3, 58             | 0.816       | 0.705       | 75      | 0.256   | 0.932       | 0.623       | 3.51 | 3.43   | <0.001 |
| Precentral (L)                          | -40, -4, 51             |             |             |         |         | 0.975       | 0.702       | 3.39 | 3.32   | <0.001 |
| Superior temporal (L)                   | -46, -8, -6             | 0.943       | 0.857       | 36      | 0.434   | 0.95        | 0.649       | 3.47 | 3.39   | <0.001 |
| Middle cingulate cortex (R)             | 12, -20, 44             | 0.968       | 0.857       | 25      | 0.52    | 0.961       | 0.649       | 3.44 | 3.36   | <0.001 |
| Postcentral (R)                         | 60, -12, 40             | 0.774       | 0.675       | 86      | 0.225   | 0.967       | 0.672       | 3.42 | 3.35   | <0.001 |
| Posterior cingulate cortex (L)          | -8, -36, 34             | 0.966       | 0.857       | 26      | 0.511   | 0.971       | 0.686       | 3.41 | 3.33   | <0.001 |
| Middle frontal (R)                      | 33, 38, 40              | 0.957       | 0.857       | 30      | 0.477   | 0.979       | 0.724       | 3.37 | 3.3    | <0.001 |

Supplementary table 4. Effects of age. All tables show data thresholded at 0.001 uncorrected, only clusters with > 20 voxels are shown. Anatomic labels are shown for peak coordinates and were defined using the automatic anatomic labelling in MRICron. **A.** The contrast older > young for pain > no pain, **B.** The contrast young > older for pain > baseline. **C.** The contrast older > young for pain > baseline.

| Anatomical area (peak coordinate)        | MNI coors mm (x, y, z) | cluster     | cluster     | cluster | cluster | peak        | peak        | peak  | peak   | peak   |
|------------------------------------------|------------------------|-------------|-------------|---------|---------|-------------|-------------|-------|--------|--------|
| MRIcron (automated anatomical labeling ) |                        | p(FWE-corr) | p(FDR-corr) | equivk  | p(unc)  | p(FWE-corr) | p(FDR-corr) | F     | equivZ | p(unc) |
| Insula (L)                               | -45, -8, 3             | 0.201       | 0.198       | 260     | 0.028   | 0.624       | 0.574       | 16.79 | 3.8    | <0.001 |
| Insula (R)                               | 46, -4, 2              | 0.455       | 0.268       | 159     | 0.077   | 0.929       | 0.849       | 14.2  | 3.49   | <0.001 |
| Superior temporal (R)                    | 46, -3, -8             |             |             |         |         | 0.95        | 0.849       | 13.88 | 3.45   | <0.001 |

*Supplementary table 5. Table showing the interaction contrast age group\*sleep condition for pain > baseline, thresholded at 0.001 uncorrected, only clusters with > 20 voxels are shown. Anatomic labels are shown for peak coordinates and were defined using the automatic anatomic labelling in MRIcron.*
